# Supplementary material for: Novel Biobased Polyamide 410/Polyamide 6/CNT Nanocomposites
Source: MDPI journal article supplement (doi:10.3390/polym10090986), 2018-09-04
Supplement: s1 [file s1]

## Supplementary Material

### Novel Biobased Polyamide 410/Polyamide 6/CNT Nanocomposites

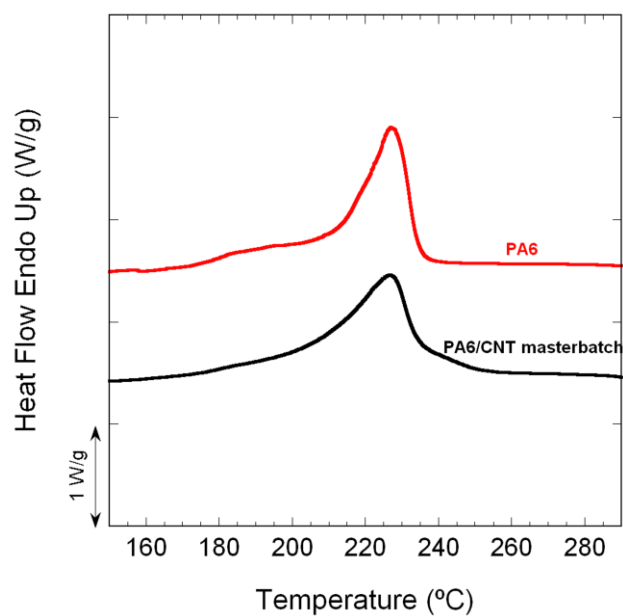

**Figure S1.** Normalized experimental melting DSC curves of PA6 and PA6/CNT masterbatch.

**Table S1.** Calorimetric parameters of PA6 vs. PA/CNT masterbatch.

|                     | $T_m^3$ (°C) | $\Delta H_m^3$ (J/g) |
|---------------------|--------------|----------------------|
| PA6                 | 227.1        | 75                   |
| PA6/CNT masterbatch | 226.7        | 71(83)               |

<sup>3</sup>Second heating scan. The value in brackets is normalized to the polymeric phase.
